# Supplementary material for: An Electronic Registry for Improving the Quality of Antenatal Care in Rural Bangladesh (eRegMat): Protocol for a Cluster Randomized Controlled Trial
Source: PubMed Central journal article supplement (PMC8292932; doi:10.2196/26918), 2021-07-06
Supplement: resprot_v10i7e26918_app1.pdf [file resprot_v10i7e26918_app1.pdf]

## eRegistry - Matlab Trial: Post-partum Home Visit Form

Date:       Interviewers Code:

DHIS2 ID #

### General information on participants in the eReg-Mat Trial

Time interview started:    :

Name of Woman:  Age:   Years

Husband's name:  Age:   Years

Address:  Village:  Union:  Upazila:  1=Matlab North 2=Matlab South

LMP:       Mobile No:

Pregnancy outcome date:        
DD MM YY

| No.                                                 | QUESTIONS & FILTERS                                                                                                                                                                | CODING RESPONSES                                                                                                                                                                                              |                                                                      | SKIP                     |
|-----------------------------------------------------|------------------------------------------------------------------------------------------------------------------------------------------------------------------------------------|---------------------------------------------------------------------------------------------------------------------------------------------------------------------------------------------------------------|----------------------------------------------------------------------|--------------------------|
| <b>SECTION 1: MOST RECENT PREGNANCY INFORMATION</b> |                                                                                                                                                                                    |                                                                                                                                                                                                               |                                                                      |                          |
| 101                                                 | Pregnancy outcome                                                                                                                                                                  | 1=Alive <input type="checkbox"/>                                                                                                                                                                              | 2=Stillbirth <input type="checkbox"/>                                | 201                      |
|                                                     |                                                                                                                                                                                    |                                                                                                                                                                                                               | 3=Abortion/miscarriage/menstrual regulation <input type="checkbox"/> |                          |
| 102                                                 | Mode of delivery                                                                                                                                                                   | Child 1                                                                                                                                                                                                       | 1= Normal delivery   2= C- section                                   | <input type="checkbox"/> |
|                                                     |                                                                                                                                                                                    | Child 2                                                                                                                                                                                                       | 1= Normal delivery   2= C- section                                   | <input type="checkbox"/> |
|                                                     |                                                                                                                                                                                    | Child 3                                                                                                                                                                                                       | 1= Normal delivery   2= C- section                                   | <input type="checkbox"/> |
| 103                                                 | What is the status of your child(ren) now?                                                                                                                                         | Child 1                                                                                                                                                                                                       | 1= Alive   2= Dead                                                   | <input type="checkbox"/> |
|                                                     |                                                                                                                                                                                    | Child 2                                                                                                                                                                                                       | 1= Alive   2= Dead                                                   | <input type="checkbox"/> |
|                                                     |                                                                                                                                                                                    | Child 3                                                                                                                                                                                                       | 1= Alive   2= Dead                                                   | <input type="checkbox"/> |
| 104                                                 | Date of neonatal death                                                                                                                                                             | Child 1                                                                                                                                                                                                       | ____-____-____                                                       |                          |
|                                                     |                                                                                                                                                                                    | Child 2                                                                                                                                                                                                       | ____-____-____                                                       |                          |
|                                                     |                                                                                                                                                                                    | Child 3                                                                                                                                                                                                       | ____-____-____                                                       |                          |
| 105                                                 | Mother's current status                                                                                                                                                            | 1= Alive                                                                                                                                                                                                      | 2= Dead                                                              | <input type="checkbox"/> |
| 106                                                 | Date of maternal death                                                                                                                                                             | ____-____-____                                                                                                                                                                                                |                                                                      |                          |
| <b>SECTION 2: PREVIOUS PREGNANCY INFORMATION</b>    |                                                                                                                                                                                    |                                                                                                                                                                                                               |                                                                      |                          |
| 201                                                 | How many total pregnancies have you had, including live births, stillbirths, abortions, miscarriages, or those ended using menstrual regulation, including your most recent birth? | If none, record 00                                                                                                                                                                                            |                                                                      | <input type="checkbox"/> |
| 202                                                 | How many total pregnancies have you had that ended in a live birth, including your most recent birth?                                                                              | If none, record 00                                                                                                                                                                                            |                                                                      | <input type="checkbox"/> |
| 203                                                 | How many total pregnancies have you had that ended in a stillbirth, including your most recent birth?                                                                              | If none, record 00                                                                                                                                                                                            |                                                                      | <input type="checkbox"/> |
| 204                                                 | How many living children do you have today, including your most recent birth?                                                                                                      | If none, record 00                                                                                                                                                                                            |                                                                      | <input type="checkbox"/> |
| <b>SECTION 3: RECENT PREGNANCY</b>                  |                                                                                                                                                                                    |                                                                                                                                                                                                               |                                                                      |                          |
| 301                                                 | Now I would like to talk you about your <u>last</u> pregnancy. Did you receive check-up/antenatal care during this pregnancy?                                                      | 1=Yes                                                                                                                                                                                                         | 2=No                                                                 | <input type="checkbox"/> |
|                                                     |                                                                                                                                                                                    | 9=Don't Remember                                                                                                                                                                                              |                                                                      | <input type="checkbox"/> |
| 302                                                 | How many times did you seek antenatal care during your pregnancy?                                                                                                                  | ____ times                                                                                                                                                                                                    | 99= Unknown                                                          |                          |
| 303                                                 | How long does it normally take to get from home to antenatal care?                                                                                                                 | ____ hours                                                                                                                                                                                                    | ____ minutes                                                         |                          |
| 304                                                 | Do you have your ANC card?                                                                                                                                                         | 1=Yes                                                                                                                                                                                                         | If yes, enter all dates below, and probe for more                    | <input type="checkbox"/> |
|                                                     |                                                                                                                                                                                    | 2=No                                                                                                                                                                                                          | If no, use a calendar to estimate dates to enter below               |                          |
| 305                                                 | When was your first ANC visit?                                                                                                                                                     | Date:                                                                                                                                                                                                         | ____/____/____                                                       |                          |
| 306                                                 | Whom did you see?                                                                                                                                                                  | 1= Doctors<br>2= Nurse/Midwife<br>3= Family Welfare Assistant<br>4= Family Welfare Visitor<br>5= Traditional Birth Attendant<br>6= Community Health Care Provider<br>7= Health Assistant<br>8= Village Doctor |                                                                      | <input type="checkbox"/> |

|     |                                                       |                                   |  |  |  |  |  |  |
|-----|-------------------------------------------------------|-----------------------------------|--|--|--|--|--|--|
|     |                                                       | 9= SACMO                          |  |  |  |  |  |  |
|     |                                                       | 10= Others (Specify)              |  |  |  |  |  |  |
| 307 | Where did you have that ANC visit?<br>Facility: _____ | 1=Home                            |  |  |  |  |  |  |
|     |                                                       | 2=H & FWC                         |  |  |  |  |  |  |
|     |                                                       | 3=Community Clinic                |  |  |  |  |  |  |
|     |                                                       | 4=UHC                             |  |  |  |  |  |  |
|     |                                                       | 5=Other public facility           |  |  |  |  |  |  |
|     |                                                       | 6=Other private facility          |  |  |  |  |  |  |
|     |                                                       | 7= Satellite Clinic               |  |  |  |  |  |  |
|     |                                                       | 8=Other (specify)                 |  |  |  |  |  |  |
| 308 | When was your second ANC visit?                       | Date:                             |  |  |  |  |  |  |
| 309 | Whom did you see?                                     | 1= Doctors                        |  |  |  |  |  |  |
|     |                                                       | 2= Nurse/Midwife                  |  |  |  |  |  |  |
|     |                                                       | 3= Family Welfare Assistant       |  |  |  |  |  |  |
|     |                                                       | 4= Family Welfare Visitor         |  |  |  |  |  |  |
|     |                                                       | 5= Traditional Birth Attendant    |  |  |  |  |  |  |
|     |                                                       | 6= Community Health Care Provider |  |  |  |  |  |  |
|     |                                                       | 7= Health Assistant               |  |  |  |  |  |  |
|     |                                                       | 8= Village Doctor                 |  |  |  |  |  |  |
|     |                                                       | 9= SACMO                          |  |  |  |  |  |  |
|     |                                                       | 10= Others (Specify)              |  |  |  |  |  |  |

|     |                                                       |                                                                                                                                                                                                                                                   |                          |
|-----|-------------------------------------------------------|---------------------------------------------------------------------------------------------------------------------------------------------------------------------------------------------------------------------------------------------------|--------------------------|
| 310 | Where did you have your ANC visit?<br>Facility: _____ | 1=Home<br>2=H & FWC<br>3=Community Clinic<br>4=UHC<br>5=Other public facility<br>6=Other private facility<br>7= Satellite Clinic<br>8=Other (specify)                                                                                             | <input type="checkbox"/> |
| 311 | When was your third ANC visit?                        | Date: _____                                                                                                                                                                                                                                       | <input type="checkbox"/> |
| 312 | Whom did you see?                                     | 1= Doctors<br>2= Nurse/Midwife<br>3= Family Welfare Assistant<br>4= Family Welfare Visitor<br>5= Traditional Birth Attendant<br>6= Community Health Care Provider<br>7= Health Assistant<br>8= Village Doctor<br>9= SACMO<br>10= Others (Specify) | <input type="checkbox"/> |
| 313 | Where did you have your ANC visit?<br>Facility: _____ | 1=Home<br>2=H & FWC<br>3=Community Clinic<br>4=UHC<br>5=Other public facility<br>6=Other private facility<br>7= Satellite Clinic<br>8=Other (specify)                                                                                             | <input type="checkbox"/> |
| 314 | When was your fourth ANC visit?                       | Date: _____                                                                                                                                                                                                                                       | <input type="checkbox"/> |
| 315 | Whom did you see?                                     | 1= Doctors<br>2= Nurse/Midwife<br>3= Family Welfare Assistant<br>4= Family Welfare Visitor<br>5= Traditional Birth Attendant<br>6= Community Health Care Provider<br>7= Health Assistant<br>8= Village Doctor<br>9= SACMO<br>10= Others (Specify) | <input type="checkbox"/> |
| 316 | Where did you have your ANC visit?<br>Facility: _____ | 1=Home<br>2=H & FWC<br>3=Community Clinic<br>4=UHC<br>5=Other public facility<br>6=Other private facility<br>7= Satellite Clinic<br>8=Other (specify)                                                                                             | <input type="checkbox"/> |
| 317 | When was your fifth ANC visit?                        | Date: _____                                                                                                                                                                                                                                       | <input type="checkbox"/> |
| 318 | Whom did you see?                                     | 1= Doctors                                                                                                                                                                                                                                        | <input type="checkbox"/> |

|                                   |  |  |  |
|-----------------------------------|--|--|--|
| 2= Nurse/Midwife                  |  |  |  |
| 3= Family Welfare Assistant       |  |  |  |
| 4= Family Welfare Visitor         |  |  |  |
| 5= Traditional Birth Attendant    |  |  |  |
| 6= Community Health Care Provider |  |  |  |
| 7= Health Assistant               |  |  |  |
| 8= Village Doctor                 |  |  |  |
| 9= SACMO                          |  |  |  |
| 10= Others (Specify)              |  |  |  |

|     |                                                       |                                                                                                                                                                                                                                                   |  |  |  |  |  |  |  |  |
|-----|-------------------------------------------------------|---------------------------------------------------------------------------------------------------------------------------------------------------------------------------------------------------------------------------------------------------|--|--|--|--|--|--|--|--|
| 319 | Where did you have your ANC visit?<br>Facility: _____ | 1=Home<br>2=H & FWC<br>3=Community Clinic<br>4=UHC<br>5=Other public facility<br>6=Other private facility<br>7= Satellite Clinic<br>8=Other (specify)                                                                                             |  |  |  |  |  |  |  |  |
| 320 | When was your sixth ANC visit?                        | Date:                                                                                                                                                                                                                                             |  |  |  |  |  |  |  |  |
| 321 | Whom did you see?                                     | 1= Doctors<br>2= Nurse/Midwife<br>3= Family Welfare Assistant<br>4= Family Welfare Visitor<br>5= Traditional Birth Attendant<br>6= Community Health Care Provider<br>7= Health Assistant<br>8= Village Doctor<br>9= SACMO<br>10= Others (Specify) |  |  |  |  |  |  |  |  |
| 322 | Where did you have your ANC visit?<br>Facility: _____ | 1=Home<br>2=H & FWC<br>3=Community Clinic<br>4=UHC<br>5=Other public facility<br>6=Other private facility<br>7= Satellite Clinic<br>8=Other (specify)                                                                                             |  |  |  |  |  |  |  |  |

*If there are more than 6 ANC visits, complete an additional sheet of paper.*

|                                                                                                 |                                                                                            |                                                                                                                                                     |  |  |  |  |        |  |  |     |
|-------------------------------------------------------------------------------------------------|--------------------------------------------------------------------------------------------|-----------------------------------------------------------------------------------------------------------------------------------------------------|--|--|--|--|--------|--|--|-----|
| Now I would like to talk to you about referrals from antenatal care during your last pregnancy. |                                                                                            |                                                                                                                                                     |  |  |  |  |        |  |  |     |
| 323                                                                                             | Were you told to seek any care or treatment from another source at any time during ANC?    | 1=Yes<br>2=No                                                                                                                                       |  |  |  |  |        |  |  | 401 |
| 324                                                                                             | Why were you referred for additional care?                                                 | 1=Diabetes, or sugar<br>2=Hypertension, pre-eclampsia, eclampsia<br>3=Anemia<br>4=Malpresentation of the baby<br>5=Other (specify)<br>99=Don't know |  |  |  |  |        |  |  |     |
| 325                                                                                             | Were you told to seek care or treatment from a specific source?                            | 1=Yes<br>2=No                                                                                                                                       |  |  |  |  | If No  |  |  | 327 |
| 326                                                                                             | Did you go to that location?                                                               | 1=Yes<br>2=No                                                                                                                                       |  |  |  |  | If Yes |  |  | 328 |
| 327                                                                                             | Did you go anywhere for care?                                                              | 1=Yes<br>2=No                                                                                                                                       |  |  |  |  | If No  |  |  | 329 |
| 328                                                                                             | Where did you go?<br><br>RECORD ONLY ONE ANSWER- WHERE WOMAN OR FAMILY <u>FIRST</u> SOUGHT | 1=Home<br>2=H & FWC<br>3=Community Clinic<br>4=UHC<br>5=Other Public facility                                                                       |  |  |  |  |        |  |  |     |

|     |                                                 |                                          |  |  |  |  |                          |
|-----|-------------------------------------------------|------------------------------------------|--|--|--|--|--------------------------|
|     | CARE/TREATMENT                                  | 6=Other private facility                 |  |  |  |  |                          |
|     |                                                 | 7=Other (specify)                        |  |  |  |  |                          |
| 329 | Why did you <u>not</u> go seek additional care? | 1=Woman Didn't Think Necessary           |  |  |  |  | <input type="checkbox"/> |
|     |                                                 | 2=Husband /Family Didn't Think Necessary |  |  |  |  |                          |
|     | RECORD ALL RESPONSES                            | 3=Facility too far                       |  |  |  |  |                          |
|     |                                                 | 4=No Transport                           |  |  |  |  |                          |
|     |                                                 | 5=No one available for child care        |  |  |  |  |                          |
|     |                                                 | 6=Could not afford it                    |  |  |  |  |                          |
|     |                                                 | 7=Services are Poor Quality              |  |  |  |  |                          |
|     |                                                 | 8=Didn't Know Where To Go                |  |  |  |  |                          |
|     |                                                 | 9=No Time to Go                          |  |  |  |  |                          |
|     |                                                 | 10=Other (Specify)                       |  |  |  |  |                          |
|     |                                                 | 99=Don't Know                            |  |  |  |  |                          |

**SECTION 4: RECENT ANTENATAL CARE AND INCENTIVES**

|     |                                                                                                                                            |                               |  |  |  |                 |               |                          |
|-----|--------------------------------------------------------------------------------------------------------------------------------------------|-------------------------------|--|--|--|-----------------|---------------|--------------------------|
| 401 | Now I would like to ask you about your antenatal visits.                                                                                   |                               |  |  |  | <b>UNPROMPT</b> | <b>PROMPT</b> |                          |
|     |                                                                                                                                            | 1=Breastfeeding               |  |  |  | A               | M             | <input type="checkbox"/> |
|     | When you were pregnant with (NAME) (last pregnancy), what topics were you counseled about during at least one of your antenatal check-ups? | 2=Maternal Danger Signs       |  |  |  | B               | N             | <input type="checkbox"/> |
|     |                                                                                                                                            | 3=Birth Planning              |  |  |  | C               | O             | <input type="checkbox"/> |
|     |                                                                                                                                            | 4=Facility Delivery           |  |  |  | D               | P             | <input type="checkbox"/> |
|     |                                                                                                                                            | 5=Nutrition in pregnancy      |  |  |  | E               | Q             | <input type="checkbox"/> |
|     | RECORD ALL RESPONSES                                                                                                                       | 6=Post partum family planning |  |  |  | F               | R             | <input type="checkbox"/> |
|     |                                                                                                                                            | 7=Other (Specify)             |  |  |  |                 |               |                          |

|     |                                   |       |                          |      |                          |   |     |
|-----|-----------------------------------|-------|--------------------------|------|--------------------------|---|-----|
| 402 | CHECK: ANY ANC AT CC OR FWC OR SC | 1=YES | <input type="checkbox"/> | 2=NO | <input type="checkbox"/> | → | 406 |
|-----|-----------------------------------|-------|--------------------------|------|--------------------------|---|-----|

|     |                                                                                                                           |       |                          |      |                          |           |                          |
|-----|---------------------------------------------------------------------------------------------------------------------------|-------|--------------------------|------|--------------------------|-----------|--------------------------|
| 403 | During any ANC visit at a CC/FWC/SC did someone ever measure your blood pressure?                                         | 1=YES | <input type="checkbox"/> | 2=NO | <input type="checkbox"/> | 3=UNKNOWN | <input type="checkbox"/> |
| 404 | During any ANC visit at a CC/FWC/SC, did someone ever take a urine sample and test it?<br>DO NOT INCLUDE PREGNANCY TESTS. | 1=YES | <input type="checkbox"/> | 2=NO | <input type="checkbox"/> | 3=UNKNOWN | <input type="checkbox"/> |
| 405 | During any ANC visit at a CC/FWC/SC, did someone ever take a tiny blood sample from your fingertip?                       | 1=YES | <input type="checkbox"/> | 2=NO | <input type="checkbox"/> | 3=UNKNOWN | <input type="checkbox"/> |

**SECTION 5: DELIVERY**

Now I would like to ask you some questions about the delivery of (NAME).

|     |                                     |                                   |  |  |  |  |  |                          |
|-----|-------------------------------------|-----------------------------------|--|--|--|--|--|--------------------------|
| 501 | Where did you give birth to (NAME)? | 1=Home                            |  |  |  |  |  | <input type="checkbox"/> |
|     |                                     | 2=H & FWC                         |  |  |  |  |  |                          |
|     |                                     | 3=Community Clinic                |  |  |  |  |  |                          |
|     |                                     | 4=UHC                             |  |  |  |  |  |                          |
|     |                                     | 5=Other public facility           |  |  |  |  |  |                          |
|     |                                     | 6=Other private facility          |  |  |  |  |  |                          |
|     |                                     | 7=Other (specify)                 |  |  |  |  |  |                          |
| 502 | Who delivered the baby?             | 1= Doctors                        |  |  |  |  |  | <input type="checkbox"/> |
|     |                                     | 2= Nurse/Midwife                  |  |  |  |  |  |                          |
|     |                                     | 3= Family Welfare Assistant       |  |  |  |  |  |                          |
|     |                                     | 4= Family Welfare Visitor         |  |  |  |  |  |                          |
|     |                                     | 5= Traditional Birth Attendant    |  |  |  |  |  |                          |
|     |                                     | 6= Community Health Care Provider |  |  |  |  |  |                          |

|  |  |                      |  |  |  |
|--|--|----------------------|--|--|--|
|  |  | 7= Health Assistant  |  |  |  |
|  |  | 8= Village Doctor    |  |  |  |
|  |  | 9= SACMO             |  |  |  |
|  |  | 10= Others (Specify) |  |  |  |

|     |                    |       |                          |   |                          |       |
|-----|--------------------|-------|--------------------------|---|--------------------------|-------|
| 503 | DELIVERED AT HOME? | 1=YES | <input type="checkbox"/> | 0 | <input type="checkbox"/> | → 510 |
|-----|--------------------|-------|--------------------------|---|--------------------------|-------|

|     |                                                                            |                         |       |      |              |                          |
|-----|----------------------------------------------------------------------------|-------------------------|-------|------|--------------|--------------------------|
| 504 | Were either of the following procedures performed at the time of delivery? | a. Received misoprostol | 1=Yes | 2=No | 9=Don't know | <input type="checkbox"/> |
|     |                                                                            | b. Injection            | 1=Yes | 2=No | 9=Don't know | <input type="checkbox"/> |

|     |                                          |                             |  |  |  |                          |
|-----|------------------------------------------|-----------------------------|--|--|--|--------------------------|
| 505 | When was misoprostol taken or inserted ? | 1= Before the baby was born |  |  |  | <input type="checkbox"/> |
|     |                                          | 2= After the baby was born  |  |  |  |                          |
|     |                                          | 3= Unknown                  |  |  |  |                          |

|     |                                                                       |                    |  |  |  |                          |
|-----|-----------------------------------------------------------------------|--------------------|--|--|--|--------------------------|
| 506 | What was the reason of using misoprostol?<br><br>RECORD ALL RESPONSES | 1=Speed Up Labour  |  |  |  | <input type="checkbox"/> |
|     |                                                                       | 2=Reduce Bleeding  |  |  |  |                          |
|     |                                                                       | 3=Stop Convulsions |  |  |  |                          |
|     |                                                                       | 4=Other (Specify)  |  |  |  |                          |
|     |                                                                       | 99=Don't Know      |  |  |  |                          |

|     |                                       |                             |  |  |  |                          |
|-----|---------------------------------------|-----------------------------|--|--|--|--------------------------|
| 507 | When was this injection administered? | 1= Before the baby was born |  |  |  | <input type="checkbox"/> |
|     |                                       | 2= After the baby was born  |  |  |  |                          |
|     |                                       | 3= Unknown                  |  |  |  |                          |

|     |                                                         |                    |  |  |  |                          |
|-----|---------------------------------------------------------|--------------------|--|--|--|--------------------------|
| 508 | What was the injection for?<br><br>RECORD ALL RESPONSES | 1=Speed Up Labour  |  |  |  | <input type="checkbox"/> |
|     |                                                         | 2=Reduce Bleeding  |  |  |  |                          |
|     |                                                         | 3=Stop Convulsions |  |  |  |                          |
|     |                                                         | 4=Other (Specify)  |  |  |  |                          |
|     |                                                         | 99=Don't Know      |  |  |  |                          |

|     |                                 |                                   |  |  |  |                          |
|-----|---------------------------------|-----------------------------------|--|--|--|--------------------------|
| 509 | Who administered the injection? | 1= Doctors                        |  |  |  | <input type="checkbox"/> |
|     |                                 | 2= Nurse/Midwives                 |  |  |  |                          |
|     |                                 | 3= Family Welfare Assistant       |  |  |  |                          |
|     |                                 | 4= Family Welfare Visitor         |  |  |  |                          |
|     |                                 | 5= Traditional Birth Attendant    |  |  |  |                          |
|     |                                 | 6= Community Health Care Provider |  |  |  |                          |
|     |                                 | 7= Health Assistant               |  |  |  |                          |
|     |                                 | 8=Village Doctor                  |  |  |  |                          |
|     |                                 | 9=Paramedic                       |  |  |  |                          |
|     |                                 | 10= Others (Specify)              |  |  |  |                          |

Now I would like to ask you about any problems you experienced during your last pregnancy and delivery.

|     |                                                                                                                                                             |                                   |          |        |                          |
|-----|-------------------------------------------------------------------------------------------------------------------------------------------------------------|-----------------------------------|----------|--------|--------------------------|
| 510 | Did you experience any of the following problems during the pregnancy, delivery, and /or up to 7 days after delivery of (NAME)?<br><br>RECORD ALL RESPONSES |                                   | UNPROMPT | PROMPT |                          |
|     |                                                                                                                                                             | A. EXCESSIVE BLEEDING             | A        | M      | <input type="checkbox"/> |
|     |                                                                                                                                                             | B. HIGH FEVER                     | B        | N      | <input type="checkbox"/> |
|     |                                                                                                                                                             | C. BAD SMELLING VAGINAL DISCHARGE | C        | O      | <input type="checkbox"/> |
|     |                                                                                                                                                             | D. CONVULSION                     | D        | P      | <input type="checkbox"/> |
|     |                                                                                                                                                             | E. PROLONGED LABOR                | E        | Q      | <input type="checkbox"/> |
|     |                                                                                                                                                             | F. RETAINED PLACENTA              | F        | R      | <input type="checkbox"/> |

SECTION 6: POSTPARTUM CARE FOR MOTHER

Now I am going to ask you about the medical care you received for your self after the delivery of (NAME)

|     |                    |       |                          |   |                          |       |
|-----|--------------------|-------|--------------------------|---|--------------------------|-------|
| 601 | DELIVERED AT HOME? | 1=YES | <input type="checkbox"/> | 0 | <input type="checkbox"/> | → 606 |
|-----|--------------------|-------|--------------------------|---|--------------------------|-------|



|                                                                                           |                                                                                                                                                                                          |                                                                                                                                |     |
|-------------------------------------------------------------------------------------------|------------------------------------------------------------------------------------------------------------------------------------------------------------------------------------------|--------------------------------------------------------------------------------------------------------------------------------|-----|
| Now, I would like to ask you some questions about your health after the time of delivery. |                                                                                                                                                                                          |                                                                                                                                |     |
| 602                                                                                       | After (NAME) was born, did you have a medical check-up?                                                                                                                                  | 1=Yes<br>2=No                                                                                                                  | 606 |
| 603                                                                                       | Where did you receive this <u>first</u> check-up?<br><br>IF RESPONDED MORE THAN ONE PLACE, ASK ABOUT THE PLACE WHERE SHE WENT <u>FIRST</u> FOR CHECK-UP.<br><br>CIRCLE ONLY ONE RESPONSE | 1=Home<br>2=H & FWC<br>3=Community Clinic<br>4=UHC<br>5=Other public facility<br>6=Other private facility<br>7=Other (specify) |     |
| 604                                                                                       | How many days after the delivery did your first check-up take place?<br><br>RECORD '00' DAYS IF SAME DAY                                                                                 | Days _____<br>99=Don't Know                                                                                                    |     |
| 605                                                                                       | Did you have this check-up because you were sick or was it a routine check-up?                                                                                                           | 1=Sick<br>2=Routine<br>3=Both<br>9=Don't Remember                                                                              |     |
| 606                                                                                       | CHECK FIRST PAGE: BABY BORN DEAD ('2')? 1=YES 2=NO                                                                                                                                       |                                                                                                                                |     |

SECTION 7: NEWBORN CARE UP TO 7 DAYS OF LIFE

Now I am going to ask you about care of the newborn baby.

|     |                                                                                                                              |                                                                                                                                                                                                                                   |            |
|-----|------------------------------------------------------------------------------------------------------------------------------|-----------------------------------------------------------------------------------------------------------------------------------------------------------------------------------------------------------------------------------|------------|
| 701 | Did (NAME) cry immediately after birth?                                                                                      | 1=Yes<br>2=No<br>9=Don't Remember                                                                                                                                                                                                 | 704        |
| 702 | Did (NAME) need help breathing or crying shortly after birth?                                                                | 1=Yes<br>2=No<br>9=Don't Remember                                                                                                                                                                                                 | 704<br>704 |
| 703 | What was done to help (NAME) cry or breath at the time of birth?<br><br>(DO NOT SUGGEST ANSWERS)<br><br>RECORD ALL RESPONSES | 1=Nothing Mentioned<br>2=Dried The Baby<br>3=Rubbed Back<br>4=Rubbed The Feet<br>5=Mouth to Mouth Resuscitation<br>6=Heated the Cord<br>7=Slapped the Baby<br>8=Held the Baby Upside Down<br>9=Bag and Mask<br>10=Other (Specify) |            |
| 704 | After (NAME) was born, did any medical persons/ health worker check (NAME)'s health?                                         | 1=Yes<br>2=No<br>9=Don't Remember                                                                                                                                                                                                 | 708<br>708 |
| 705 | How many days after the delivery did (NAME)'s first check-up take place?<br><br>RECORD '00' DAYS IS SAME DAY                 | DAYS AFTER DELIVERY _____<br>99=DON'T KNOW/ REMEMBER                                                                                                                                                                              |            |
| 706 | Where did the <u>first</u> check-up take place?<br><br>Facility name: _____                                                  | 1=Home<br>2=H & FWC<br>3=Community Clinic<br>4=UHC                                                                                                                                                                                |            |

|                                       |                                                                                                                                                                  |                             |                  |                          |                      |                           |                      |                          |                          |
|---------------------------------------|------------------------------------------------------------------------------------------------------------------------------------------------------------------|-----------------------------|------------------|--------------------------|----------------------|---------------------------|----------------------|--------------------------|--------------------------|
|                                       |                                                                                                                                                                  |                             |                  | 5=Other public facility  |                      |                           |                      |                          |                          |
|                                       |                                                                                                                                                                  |                             |                  | 6=Other private facility |                      |                           |                      |                          |                          |
|                                       |                                                                                                                                                                  |                             |                  | 7=Other (specify)        |                      |                           |                      |                          |                          |
| 707                                   | Was this check because (NAME) was sick or was it a routine check-up?                                                                                             |                             |                  | 1=Sick                   |                      |                           |                      |                          | <input type="checkbox"/> |
|                                       |                                                                                                                                                                  |                             |                  | 2=Routine                |                      |                           |                      |                          |                          |
|                                       |                                                                                                                                                                  |                             |                  | 3=Both                   |                      |                           |                      |                          |                          |
|                                       |                                                                                                                                                                  |                             |                  | 9=Don't Remember         |                      |                           |                      |                          |                          |
| 708                                   | During the first week of life did (NAME) have any of the following problems?                                                                                     | Fever                       |                  | 1=Yes                    |                      | 2=No                      |                      | 9=Don't know             | <input type="checkbox"/> |
|                                       |                                                                                                                                                                  | Difficulty Breathing        |                  | 1=Yes                    |                      | 2=No                      |                      | 9=Don't know             | <input type="checkbox"/> |
|                                       |                                                                                                                                                                  | Jaundice                    |                  | 1=Yes                    |                      | 2=No                      |                      | 9=Don't know             | <input type="checkbox"/> |
|                                       |                                                                                                                                                                  | Diarrhea                    |                  | 1=Yes                    |                      | 2=No                      |                      | 9=Don't know             | <input type="checkbox"/> |
|                                       |                                                                                                                                                                  | Umbilical Cord Infection    |                  | 1=Yes                    |                      | 2=No                      |                      | 9=Don't know             | <input type="checkbox"/> |
|                                       |                                                                                                                                                                  | Convulsions                 |                  | 1=Yes                    |                      | 2=No                      |                      | 9=Don't know             | <input type="checkbox"/> |
|                                       |                                                                                                                                                                  | Feeding Problem             |                  | 1=Yes                    |                      | 2=No                      |                      | 9=Don't know             | <input type="checkbox"/> |
|                                       |                                                                                                                                                                  | Others (specify)            |                  |                          |                      |                           |                      |                          |                          |
| 709                                   | During the first week of life, was (NAME) ever admitted to the hospital for one of the previously mentioned problems?                                            |                             | 1=Yes            |                          |                      |                           |                      |                          | <input type="checkbox"/> |
|                                       |                                                                                                                                                                  |                             | 2=No             |                          |                      |                           |                      | —————→                   | 713                      |
|                                       |                                                                                                                                                                  |                             | 9=Don't Remember |                          |                      |                           |                      |                          | —————→                   |
| 710                                   | When was the baby first admitted to the hospital?                                                                                                                |                             | Date:            |                          |                      |                           |                      | <input type="text"/>     |                          |
| 711                                   | When was the baby first discharged from the hospital?                                                                                                            |                             | Date:            |                          |                      |                           |                      | <input type="text"/>     |                          |
| 712                                   | Was the baby admitted to the hospital more than 1 time?                                                                                                          |                             |                  |                          | day                  | month                     | yr                   |                          | <input type="checkbox"/> |
|                                       |                                                                                                                                                                  | 1 = Yes                     | 2nd              |                          | <input type="text"/> | -                         | <input type="text"/> | -                        | <input type="text"/>     |
|                                       |                                                                                                                                                                  |                             | 3rd              |                          | <input type="text"/> | -                         | <input type="text"/> | -                        | <input type="text"/>     |
|                                       |                                                                                                                                                                  |                             | 4th              |                          | <input type="text"/> | -                         | <input type="text"/> | -                        | <input type="text"/>     |
|                                       |                                                                                                                                                                  |                             | 2=No             |                          |                      |                           |                      |                          |                          |
|                                       |                                                                                                                                                                  |                             | 9=Don't Remember |                          |                      |                           |                      |                          |                          |
| 713                                   | At any time during your pregnancy/delivery/postpartum period did you receive any financial support or assistance from any source to encourage you to attend ANC? |                             | 1=Yes            |                          |                      |                           |                      | <input type="checkbox"/> |                          |
|                                       |                                                                                                                                                                  |                             | 2=No             |                          |                      |                           |                      |                          |                          |
|                                       |                                                                                                                                                                  |                             | 3= Don't Know    |                          |                      |                           |                      |                          |                          |
| <b>SECTION 8: BIOLOGICAL</b>          |                                                                                                                                                                  |                             |                  |                          |                      |                           |                      |                          |                          |
| 801                                   | Baby's weight (kg)                                                                                                                                               |                             |                  |                          |                      |                           |                      | <input type="text"/>     |                          |
| 802                                   | Haemoglobin (g/dl) level of women                                                                                                                                |                             |                  |                          |                      |                           |                      | <input type="text"/>     |                          |
| <b>SECTION 9: SOCIO-ECOMIC STATUS</b> |                                                                                                                                                                  |                             |                  |                          |                      |                           |                      |                          |                          |
| 901                                   | Women's education                                                                                                                                                | <b>Types of institution</b> |                  |                          |                      | <b>Years of education</b> |                      |                          |                          |
|                                       |                                                                                                                                                                  | 1= School- Formal           |                  |                          |                      | <input type="text"/>      |                      |                          |                          |
|                                       |                                                                                                                                                                  | 2= School-Nonformal         |                  |                          |                      | <input type="text"/>      |                      |                          |                          |
|                                       |                                                                                                                                                                  | 3= Madrassah-Registered     |                  |                          |                      | <input type="text"/>      |                      |                          |                          |
|                                       |                                                                                                                                                                  | 4= Madrassah-Unregistered   |                  |                          |                      | <input type="text"/>      |                      |                          |                          |
| 902                                   | Husband's education                                                                                                                                              | <b>Types of institution</b> |                  |                          |                      | <b>Years of education</b> |                      |                          |                          |
|                                       |                                                                                                                                                                  | 1= School- Formal           |                  |                          |                      | <input type="text"/>      |                      |                          |                          |
|                                       |                                                                                                                                                                  | 2= School-Nonformal         |                  |                          |                      | <input type="text"/>      |                      |                          |                          |
|                                       |                                                                                                                                                                  | 3= Madrassah-Registered     |                  |                          |                      | <input type="text"/>      |                      |                          |                          |

|                      |                                                                                                                                                                                                       |                                                                                                |                           |                      |                      |                      |
|----------------------|-------------------------------------------------------------------------------------------------------------------------------------------------------------------------------------------------------|------------------------------------------------------------------------------------------------|---------------------------|----------------------|----------------------|----------------------|
|                      |                                                                                                                                                                                                       |                                                                                                | 4= Madrassah-Unregistered |                      |                      |                      |
| Information on Land: |                                                                                                                                                                                                       |                                                                                                |                           |                      |                      |                      |
| 903                  | How much land do your household own?                                                                                                                                                                  | <b>Decimal</b>                                                                                 | <b>Kani</b>               | <b>Gonda</b>         | <b>Kora</b>          |                      |
|                      | Homestead (including ponds & ditches)                                                                                                                                                                 | <input type="text"/>                                                                           | <input type="text"/>      | <input type="text"/> | <input type="text"/> |                      |
|                      | Agricultural land                                                                                                                                                                                     | <input type="text"/>                                                                           | <input type="text"/>      | <input type="text"/> | <input type="text"/> |                      |
|                      |                                                                                                                                                                                                       |                                                                                                | 1 Kani= Decimal           | 1 Gonda= Decimal     | 1 Kora= Decimal      |                      |
| Source of Income:    |                                                                                                                                                                                                       |                                                                                                |                           |                      |                      |                      |
| 904                  | a. During the last 12 months what were the sources of income of your household?                                                                                                                       | 1. Agriculture (Own land)                                                                      |                           |                      |                      | <input type="text"/> |
|                      |                                                                                                                                                                                                       | 2. Agriculture (Share crops)                                                                   |                           |                      |                      | <input type="text"/> |
|                      |                                                                                                                                                                                                       | 3. Land/ pond mortgage/ lease/ rent (in/out)                                                   |                           |                      |                      | <input type="text"/> |
|                      |                                                                                                                                                                                                       | 4. Day labourer/ Rickshaw/ Van puller                                                          |                           |                      |                      | <input type="text"/> |
|                      |                                                                                                                                                                                                       | 5. Skilled labourer (driver, carpenter, plumber, electrician)                                  |                           |                      |                      | <input type="text"/> |
|                      |                                                                                                                                                                                                       | 6. Selling/Catching Fish /Fish Farming                                                         |                           |                      |                      | <input type="text"/> |
|                      |                                                                                                                                                                                                       | 7. Cattle/ Chicken/ Duck/ Poultry/Selling Milk                                                 |                           |                      |                      | <input type="text"/> |
|                      |                                                                                                                                                                                                       | 8. Selling Handicrafts                                                                         |                           |                      |                      | <input type="text"/> |
|                      | RECORD ALL RESPONSES                                                                                                                                                                                  | 9. Tailoring Work                                                                              |                           |                      |                      | <input type="text"/> |
|                      |                                                                                                                                                                                                       | 10. Business (Small)                                                                           |                           |                      |                      | <input type="text"/> |
|                      |                                                                                                                                                                                                       | 11. Business (MEDIUM)                                                                          |                           |                      |                      | <input type="text"/> |
|                      |                                                                                                                                                                                                       | 12. Various Business (BIG)                                                                     |                           |                      |                      | <input type="text"/> |
|                      |                                                                                                                                                                                                       | 13. Paid Employment                                                                            |                           |                      |                      | <input type="text"/> |
|                      | b. What was the source of income?                                                                                                                                                                     | 14. Pension                                                                                    |                           |                      |                      | <input type="text"/> |
|                      |                                                                                                                                                                                                       | 15. Remittance (within country)                                                                |                           |                      |                      | <input type="text"/> |
|                      | i. <input type="text"/>                                                                                                                                                                               | 16. Remittance (Outside country)                                                               |                           |                      |                      | <input type="text"/> |
|                      | ii. <input type="text"/>                                                                                                                                                                              | 17. Food for work                                                                              |                           |                      |                      | <input type="text"/> |
|                      | iii. <input type="text"/>                                                                                                                                                                             | 18. Old age/ destitute (allowances)/ VGD/ Other allowances (Freedom fighter), Chairman, Member |                           |                      |                      | <input type="text"/> |
|                      | iv. <input type="text"/>                                                                                                                                                                              | 19. House/ Shop rent                                                                           |                           |                      |                      | <input type="text"/> |
|                      | v. <input type="text"/>                                                                                                                                                                               | 20. Rent of Taxi, Tempo, Auto                                                                  |                           |                      |                      | <input type="text"/> |
|                      |                                                                                                                                                                                                       | 21. Boat/ Rickshaw/ van renting out                                                            |                           |                      |                      | <input type="text"/> |
|                      |                                                                                                                                                                                                       | 22. Interest Business                                                                          |                           |                      |                      | <input type="text"/> |
|                      |                                                                                                                                                                                                       | 23. Journalist                                                                                 |                           |                      |                      | <input type="text"/> |
|                      |                                                                                                                                                                                                       | 24. Others (specify)                                                                           |                           |                      |                      | <input type="text"/> |
| Food security:       |                                                                                                                                                                                                       |                                                                                                |                           |                      |                      |                      |
| 905                  | Some households may not have food for all members three times every day for all times). Has your household been able to have food for all members for three times every day during the last one year? | 1=Yes                                                                                          |                           | 2=No                 |                      | <input type="text"/> |
| Housing Facility:    |                                                                                                                                                                                                       |                                                                                                |                           |                      |                      |                      |
| 906                  | a. How many rooms does your household have?                                                                                                                                                           |                                                                                                |                           |                      |                      | <input type="text"/> |
|                      | b. Materials used for construction of the main dwelling<br><br>(Write by observing)                                                                                                                   | Items                                                                                          |                           |                      |                      |                      |
|                      |                                                                                                                                                                                                       | 1= Hemp/hay/bamboo, or other                                                                   |                           |                      |                      | <input type="text"/> |
|                      |                                                                                                                                                                                                       | 2= Mud brick, or C.I. sheet/wood                                                               |                           |                      |                      | <input type="text"/> |
|                      |                                                                                                                                                                                                       | 3= Brick/cement                                                                                |                           |                      |                      | <input type="text"/> |
| Commodities/ Assets  |                                                                                                                                                                                                       |                                                                                                |                           |                      |                      |                      |
| 907                  | a. Does your household own the following commodities or assets?                                                                                                                                       | Rickshaw/ Rickshaw van                                                                         |                           | 1=Yes                | 2=No                 | <input type="text"/> |
|                      |                                                                                                                                                                                                       | Auto rickshaw (CNG/ Battery/ Patrol)                                                           |                           | 1=Yes                | 2=No                 | <input type="text"/> |
|                      |                                                                                                                                                                                                       | Power tiller (Cultivation)                                                                     |                           | 1=Yes                | 2=No                 | <input type="text"/> |
|                      |                                                                                                                                                                                                       | Pump (irrigation / water pump)                                                                 |                           | 1=Yes                | 2=No                 | <input type="text"/> |
|                      |                                                                                                                                                                                                       | Computer                                                                                       |                           | 1=Yes                | 2=No                 | <input type="text"/> |
|                      |                                                                                                                                                                                                       | Solar panel                                                                                    |                           | 1=Yes                | 2=No                 | <input type="text"/> |

|                                                    |                                                                                |  |                                           |  |   |                  |      |      |        |  |
|----------------------------------------------------|--------------------------------------------------------------------------------|--|-------------------------------------------|--|---|------------------|------|------|--------|--|
| RECORD ALL RESPONSES                               | Almirah/ Showcase                                                              |  |                                           |  |   | 1=Yes            |      | 2=No |        |  |
|                                                    | Sofa set                                                                       |  |                                           |  |   | 1=Yes            |      | 2=No |        |  |
|                                                    | Television                                                                     |  |                                           |  |   | 1=Yes            |      | 2=No |        |  |
|                                                    | Mobile phone                                                                   |  |                                           |  |   | 1=Yes            |      | 2=No |        |  |
|                                                    | Bi-cycle                                                                       |  |                                           |  |   | 1=Yes            |      | 2=No |        |  |
|                                                    | Motor cycle                                                                    |  |                                           |  |   | 1=Yes            |      | 2=No |        |  |
|                                                    | Refrigerator                                                                   |  |                                           |  |   | 1=Yes            |      | 2=No |        |  |
|                                                    | Fan                                                                            |  |                                           |  |   | 1=Yes            |      | 2=No |        |  |
| b. How many fans does your household own?          |                                                                                |  |                                           |  |   |                  |      |      |        |  |
| c. How many mobile phones does your household own? |                                                                                |  |                                           |  |   |                  |      |      |        |  |
| d. Do you own/use your own phone?                  |                                                                                |  |                                           |  |   | 1=Yes            |      | 2=No |        |  |
| Livestock                                          |                                                                                |  |                                           |  |   |                  |      |      |        |  |
| 908                                                | Does your household own livestock?                                             |  |                                           |  |   | 1=Yes            |      | 2=No |        |  |
| 909                                                | If yes, please mention type and number?                                        |  |                                           |  |   |                  | Type |      | Number |  |
|                                                    |                                                                                |  |                                           |  | 1 | Duck and Chicken |      |      |        |  |
|                                                    |                                                                                |  |                                           |  | 2 | Goat and Sheep   |      |      |        |  |
|                                                    |                                                                                |  |                                           |  | 3 | Cow and Buffalo  |      |      |        |  |
| Latrine                                            |                                                                                |  |                                           |  |   |                  |      |      |        |  |
| 910                                                | Do you have any latrine?                                                       |  |                                           |  |   | 1=Yes            |      | 2=No |        |  |
| 911                                                | What types of latrines are used by your household?<br><br>(Write by observing) |  | 1= Septic tank/ modern toilet             |  |   |                  |      |      |        |  |
|                                                    |                                                                                |  | 2= Ring/Slab but waste not drained out    |  |   |                  |      |      |        |  |
|                                                    |                                                                                |  | 3= Ring/Slab but waste drained out        |  |   |                  |      |      |        |  |
|                                                    |                                                                                |  | 4= Concrete latrine but waste drained out |  |   |                  |      |      |        |  |
|                                                    |                                                                                |  | 5= Kancha (Earth) latrine (open)          |  |   |                  |      |      |        |  |
|                                                    |                                                                                |  | 6= Open/Bush                              |  |   |                  |      |      |        |  |
|                                                    |                                                                                |  | 7= Others (Specify)                       |  |   |                  |      |      |        |  |
| Drinking Water (with in 1 year)                    |                                                                                |  |                                           |  |   |                  |      |      |        |  |
| 912                                                | What are the main source (most commonly used) of drinking water?               |  | 1= Deep Tubewell                          |  |   |                  |      |      |        |  |
|                                                    |                                                                                |  | 2= Tubewell (Green)                       |  |   |                  |      |      |        |  |
|                                                    |                                                                                |  | 3= Tubewell (red)                         |  |   |                  |      |      |        |  |
|                                                    |                                                                                |  | 4= Tubewell not tested yet                |  |   |                  |      |      |        |  |
|                                                    |                                                                                |  | 5= Supply water                           |  |   |                  |      |      |        |  |
|                                                    |                                                                                |  | 6= Rain water                             |  |   |                  |      |      |        |  |
|                                                    |                                                                                |  | 7= Pond                                   |  |   |                  |      |      |        |  |
|                                                    |                                                                                |  | 8= River                                  |  |   |                  |      |      |        |  |
|                                                    |                                                                                |  | 9= Ditch/ canal                           |  |   |                  |      |      |        |  |
|                                                    |                                                                                |  | 10= Others (specify)                      |  |   |                  |      |      |        |  |
| Source of Light                                    |                                                                                |  |                                           |  |   |                  |      |      |        |  |
| 913                                                | Main source of power/ electricity?                                             |  | 1= Kerosine Oil                           |  |   |                  |      |      |        |  |
|                                                    |                                                                                |  | 2= Electricity                            |  |   |                  |      |      |        |  |
|                                                    |                                                                                |  | 3= Solar Panel                            |  |   |                  |      |      |        |  |
|                                                    |                                                                                |  | 4= Generator                              |  |   |                  |      |      |        |  |
|                                                    |                                                                                |  | 5= Others (specify)                       |  |   |                  |      |      |        |  |
| Fuel                                               |                                                                                |  |                                           |  |   |                  |      |      |        |  |
| 914                                                | Type of fuel mainly used for cooking                                           |  | 1= Wood/Wood dust/Paddy Husk              |  |   |                  |      |      |        |  |
|                                                    |                                                                                |  | 2= Leaves and straw                       |  |   |                  |      |      |        |  |
|                                                    |                                                                                |  | 3= Kerosine (stove)                       |  |   |                  |      |      |        |  |
|                                                    |                                                                                |  | 4= Gas (line)                             |  |   |                  |      |      |        |  |
